# Supplementary figures and images for: CORRIGENDUM FOR “Inhibition of Human Adrenocortical Cancer Cell Growth by Temozolomide in Vitro and the Role of theMGMT Gene”
Source: PubMed Central journal article supplement — J Clin Endocrinol Metab. 2018 Jun 13;103(8):3115–8. doi: 10.1210/jc.2018-01269 (PMC7263791; doi:10.1210/jc.2018-01269), 2018-06-13

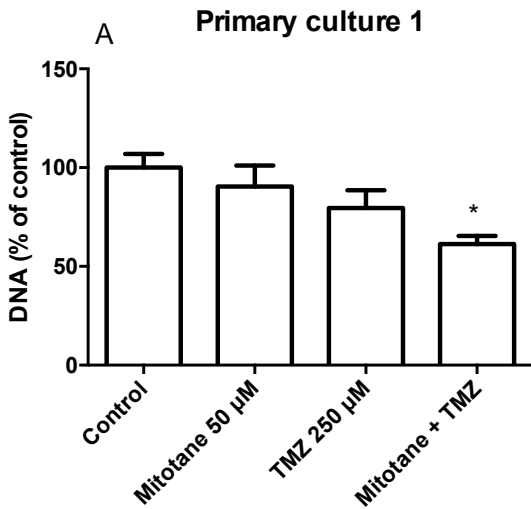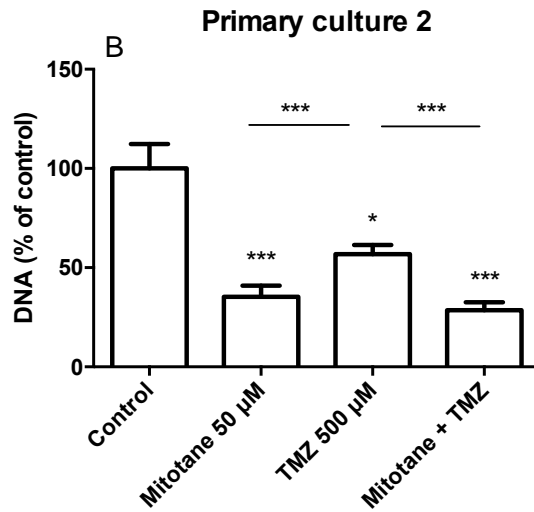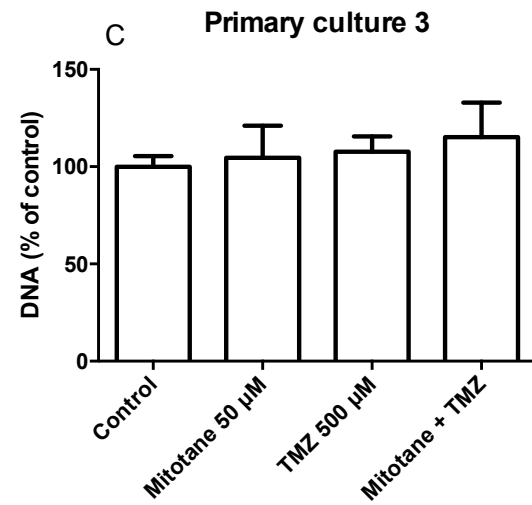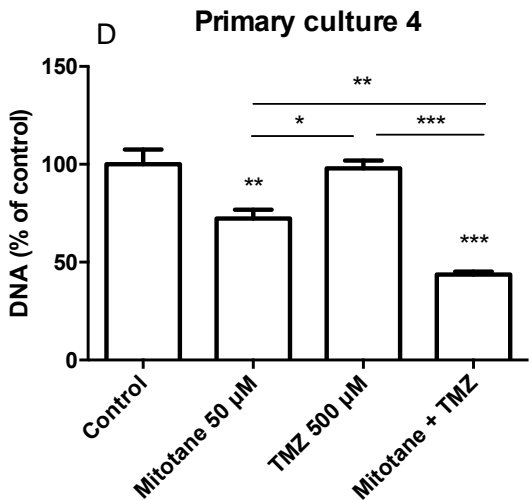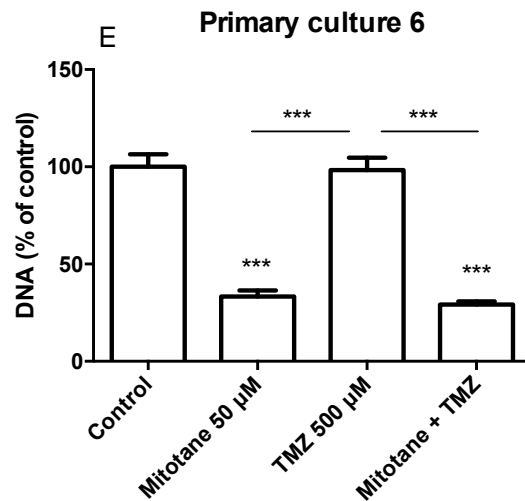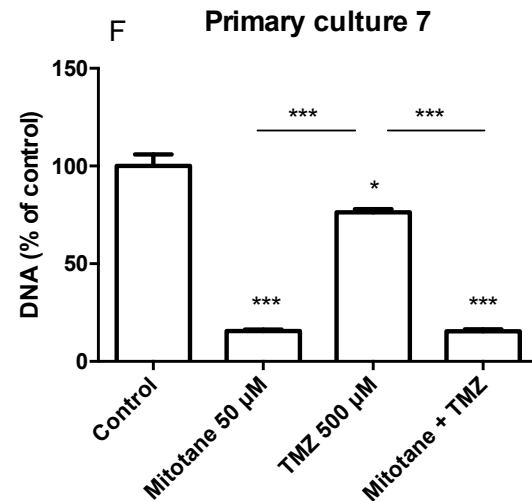

Supplement: jc.2018-01269.sf1.pdf [file jc.2018-01269.sf1.pdf]
